# 1 Brain aerobic glycolysis and resilience in Alzheimer disease

2  
3 Manu S. Goyal<sup>1-5\*</sup>, Tyler Blazey<sup>1,3</sup>, Nicholas V. Metcalf<sup>1,3</sup>, Mark P. McAvoy<sup>1,3</sup>, Jeremy Strain<sup>2</sup>,  
4 Maryam Rahmani<sup>1</sup>, Tony J. Durbin<sup>1,3</sup>, Chengjie Xiong<sup>4</sup>, Tammie L.-S. Benzinger<sup>1,3,4</sup>, John C.  
5 Morris<sup>2,4</sup>, Marcus E. Raichle<sup>1-7\*</sup>, Andrei G. Vlassenko<sup>1,3,4</sup>

6  
7 <sup>1</sup>Mallinckrodt Institute of Radiology, <sup>2</sup>Department of Neurology, <sup>3</sup>Neuroimaging Labs  
8 Research Center, <sup>4</sup>Knight Alzheimer Disease Research Center, <sup>5</sup>Department of  
9 Neuroscience, <sup>6</sup>Department of Biomedical Engineering, <sup>7</sup>Department of Psychology & Brain  
10 Science, Washington University School of Medicine, St. Louis, MO, USA

11  
12 \*Corresponding Authors

13 Marcus E. Raichle

14 Manu S. Goyal

15 Mallinckrodt Institute of Radiology

16 510 S Kingshighway Blvd

17 St. Louis, MO 63110

18 Phone: 314-362-5950

19 Fax: 314-362-4886

20 mraichle@wustl.edu

21 goyalm@wustl.edu

## 22 23 **ABSTRACT**

24  
25 The distribution of brain aerobic glycolysis (AG) in normal young adults correlates spatially  
26 with amyloid-beta (A $\beta$ ) deposition in individuals with dementia of the Alzheimer type (DAT)  
27 and asymptomatic individuals with brain amyloid deposition. Brain AG decreases with age  
28 but the functional significance of this decrease with regard to the development of DAT  
29 symptomatology is poorly understood. Using PET measurements of regional blood flow,  
30 oxygen consumption and glucose utilization—from which we derive AG—we find that  
31 cognitive impairment is strongly associated with loss of the typical youthful pattern of AG. In  
32 contrast, amyloid positivity without cognitive impairment was associated with preservation of  
33 youthful brain AG, which was even higher than that seen in typical, cognitively unimpaired,  
34 amyloid negative adults. Similar findings were not seen for blood flow nor oxygen  
35 consumption. Finally, in cognitively unimpaired adults, white matter hyperintensity burden  
36 was found to be specifically associated with decreased youthful brain AG. Our results  
37 implicate preserved AG as a factor in brain resilience to amyloid pathology and suggest that  
38 white matter disease may be a cause and/or consequence of this impaired resilience.

## 39 INTRODUCTION

40

41 The healthy human brain largely relies upon glucose to fuel mitochondrial respiration. Yet, in  
42 young adults, a portion of resting glucose consumption exceeds that predicted by oxygen  
43 consumption rates<sup>1</sup>. Though the role(s) of this excess glucose utilization—i.e., aerobic  
44 glycolysis (AG), remain uncertain, some studies suggest that AG in the brain may support  
45 neurite outgrowth<sup>2,3</sup>, myelination<sup>4-7</sup>, learning<sup>8,9</sup>, reducing oxidative stress<sup>10</sup>, rapid and  
46 anticipatory neuronal activity<sup>11</sup>, and microglial activity<sup>12,13</sup>. AG in the young adult occurs more  
47 so in regions that are transcriptionally neotenuous and evolutionarily expanded in humans<sup>14</sup>.  
48 Prior studies in humans demonstrate that brain AG decreases on average in healthy older  
49 adults, based on whole brain quantitative measurements<sup>15,16</sup> as well as in terms of its  
50 regional pattern in young adults<sup>17</sup>. Moreover, sex influences the youthful pattern of brain  
51 glycolysis, being relatively more preserved in cognitively unimpaired aging females than in  
52 males<sup>18</sup>.

53

54 AG in the human brain is also affected by Alzheimer disease (AD). Whole brain estimates  
55 show that early AD is associated with a significant decrease in glucose consumption rates  
56 compared to a relatively slight change in oxygen consumption<sup>19-21</sup>. Interesting, amyloid  
57 deposition in both cognitively intact and impaired adults follows a regional pattern that  
58 matches that of brain AG in young adults<sup>22,23</sup>. Although several studies have studied total  
59 regional brain glucose consumption in relation to cognitive impairment with <sup>18</sup>FDG PET,  
60 none to our knowledge has studied how regional AG is specifically affected, as compared to  
61 the larger component of brain glucose use that occurs for oxidative phosphorylation.

62

63 Here we investigate regional brain AG in AD by combining <sup>18</sup>FDG PET with <sup>15</sup>O-labeled H<sub>2</sub>O,  
64 O<sub>2</sub> and CO PET to estimate glucose and oxygen metabolism together—and thereby AG—in  
65 individuals further characterized with amyloid imaging and cognitive testing. Our primary  
66 hypotheses were that youthful brain AG will be reduced in cognitively impaired individuals  
67 and preserved in cognitively intact individuals with biomarker-defined (i.e., brain amyloid  
68 positive) AD, as a reflection of brain resilience.

69

## 70 RESULTS

71

### 72 *Study Overview*

73 All research participants provided informed consent and all study procedures were approved  
74 by the Washington University School of Medicine Institutional Review Board. A total of 353  
75 multi-tracer metabolic PET sessions were performed in 285 adult individuals (25-92 yo, 56%  
76 female) between the years of 2013 and 2021. Portions of these data, now labeled as the  
77 Aging Metabolism & Brain Resilience (“AMBR”) study, have been published previously<sup>17</sup>.  
78 Age, sex, amyloid positivity and cognitive status were defined for each individual and each of  
79 their PET imaging session(s). Amyloid status was unavailable in 80 sessions, including in  
80 only 18 individuals ≥60 yo and in 62 individuals <60 yo; note that all 40 participants <60 yo  
81 who underwent amyloid PET imaging were found to be negative. Accordingly, absent  
82 amyloid status was considered to be amyloid negative until proven otherwise. Cognitive  
83 status was typically defined using the Clinical Dementia Rating® (CDR®) scale, specifically  
84 using the sum of boxes score; when CDR could not be fully completed (n=39), cognitive  
85 status (normal versus impaired) was instead inferred from additional cognitive testing data.  
86 Further details on study procedures are provided below (see Methods).

87

88 From the metabolic PET measures, the glycolytic index (GI, a relative measure of AG),  
89 cerebral metabolic rate of glucose (CMRGlc), cerebral metabolic rate of oxygen (CMRO<sub>2</sub>),  
90 and cerebral blood flow (CBF) were calculated and partial volume corrected to regions  
91 defined by the Desikan-Killiany atlas and FreeSurfer subcortical parcellations. Symptomatic  
92 and “preclinical” (i.e., asymptomatic) AD were defined as individuals with brain amyloid  
93 positivity, with or without cognitive impairment, respectively.

94

#### 95 *Analysis overview*

96 For each PET session and independent metabolic measure (GI, CMRGlc, CMRO<sub>2</sub>, and  
97 CBF), a “youthful pattern” was defined based on its correlation to average gray matter  
98 regional values calculated in a separate, previously published but re-processed dataset  
99 comprising a cohort of young healthy adults (“N33 cohort”, 20-34 yo) (Figure 1)<sup>24</sup>. The N33  
100 cohort was used to define the “youthful pattern” for each metabolic parameter in order to  
101 avoid biasing results derived from the larger AMBR cohort. However, as the N33 data were  
102 acquired approximately a decade prior with different scanner technology, an obvious outlier  
103 region (the pars orbitalis) was identified and was removed from further analysis *a priori*. The  
104 AMBR data was subjected to quantile normalization for each metabolic measure to remove  
105 “batch” effects that could have arisen during the 8 years of data collection. A Spearman rank  
106 correlation rho was then calculated for each PET session in the AMBR study as compared to  
107 the group results from the N33 cohort to calculate the “youthful index” of each metabolic  
108 measurement at the time of that PET session. These measures were subsequently related  
109 to age, sex, amyloid positivity and cognitive status using generalized linear and mixed  
110 models.

111

#### 112 *Youthful brain metabolism decreases variably with age and sex*

113 For all metabolic measures, the youthful pattern was maintained in young adults from the  
114 AMBR cohort (Figure 2). With increasing age, this youthful pattern for all metabolic  
115 parameters was variably maintained, with increasing degrees of inter-individual variability in  
116 patterns of brain metabolism, particularly for GI.

117

118 Prior observations on a subset of these data suggested that the youthful pattern of brain  
119 metabolism is more typically preserved in cognitively intact females than in males<sup>18</sup>. Here,  
120 female sex was again associated with a higher youthful GI index when controlling for age  
121 and amyloid status (p<0.05). This was true also for the youthful CMRO<sub>2</sub> (p<0.005) and CBF  
122 (p<0.05) indices, but not significantly so for the youthful CMRGlc index. Given these  
123 findings, age and sex were included as covariates in the subsequent analyses.

124

#### 125 *Cognitive impairment is associated with decreased youthful brain glycolysis*

126 Cognitive impairment, as measured by CDR sum of boxes, was associated with age  
127 (p<0.005), male sex (p<0.05), and amyloid positivity (p<0.001). Cognitive impairment was  
128 further highly associated with decreased youthful GI index (p<0.0013) and youthful CMRGlc  
129 index (p<0.01), controlling for age, sex, and amyloid status. However, neither the youthful  
130 CMRO<sub>2</sub> nor CBF indices were significantly associated with cognitive impairment. These  
131 results suggest early cognitive impairment is associated with changes specifically in  
132 glycolysis.

133

134 *Cognitive resilience is associated with preserved youthful brain glycolysis*

135 If loss of the youthful glycolysis pattern during early cognitive impairment is due to direct  
136 effects of amyloid deposition rather than downstream neurodegeneration, we would predict  
137 that the youthful GI index would be lower also in amyloid positive, cognitively intact  
138 individuals. However, when restricting our analysis to individuals with CDR=0, we did not  
139 find this relationship. Instead, amyloid positivity in cognitively intact individuals correlated  
140 with *higher* youthful GI index ( $p < 0.01$ ), suggesting that preservation of AG in the typical  
141 glycolytic areas of youth is associated with cognitive resilience to the presence of brain  
142 amyloid (Figure 3).

143

144 Given the presence of longitudinally repeated measures in a subset of individuals within the  
145 AMBR dataset, a mixed effects model was constructed to account for subjects as a random  
146 effect. The youthful GI index was further normalized using a Yeo-Johnson transformation<sup>25</sup>.  
147 This model again confirmed that the youthful GI index was, on average, *higher* in amyloid  
148 positive, cognitively intact individuals ( $p < 0.05$ ). The same analysis for total CMRGlc, CMRO<sub>2</sub>  
149 and CBF did not reveal a similar significant relationship for any of these other metabolic  
150 parameters. Thus, the association between youthful brain metabolism and cognitive  
151 resilience in amyloid positive individuals is specific to brain AG.

152

#### 153 *Specific brain regions show reduced AG in aging and AD*

154 The results above investigate the preservation or loss of a youthful regional pattern of  
155 metabolism. This analysis was prescribed *a priori* to maximize signal-to-noise by using an  
156 omnibus measure of regional brain metabolism. However, effects of AD on brain metabolism  
157 may extend beyond a decrease in the youthful pattern of brain metabolism. We therefore  
158 computed region-by-region generalized regression models to explore the effects of age and  
159 AD on group-normalized GI within each region independently. As our metabolic data are not  
160 quantitative, only regions with significant negative changes in metabolism are included here,  
161 accounting for prior studies that demonstrate that whole brain glycolysis quantitatively  
162 decreases with age and in AD<sup>14-16,18-20</sup>.

163

164 Increased age was associated with decreases in GI in the superior frontal, superior parietal,  
165 caudal middle frontal, medial orbitofrontal, and entorhinal cortices and the banks of the  
166 superior temporal sulcus (Figure 4). These age related changes mirror those regions with  
167 the highest GI in young healthy adults (see Figure 1, N33 group average). Controlling for  
168 age and sex, AD status was associated with significantly reduced GI in the rostral middle  
169 frontal, inferior temporal, inferior parietal, lateral orbitofrontal, middle temporal cortices, and  
170 precuneus (Figure 4).

171

#### 172 *White matter hyperintensity burden is specifically associated with reduced AG*

173 White matter hyperintensities (WMH) are nearly ubiquitous in the aged human brain, though  
174 the volume of WMH varies considerably across individuals; higher volumes are associated  
175 with increased risk of cognitive decline. Given that WMH are located along tracts connecting  
176 gray matter regions, we hypothesized that increased WMH burden might be a key factor that  
177 reduces AG in the aging brain.

178

179 We acquired 1 mm<sup>3</sup> isotropic FLAIR sequences in 142 cognitively unimpaired individuals of  
180 this cohort. WMH were then segmented using intensity thresholding, manual selection of  
181 lesions, re-thresholding, and quality control (see Methods below for details). Since WMH  
182 volumes fit a log-normal distribution in this cohort, they were then log transformed before

183 comparing to brain AG and the other metabolic measures. Controlling for age, sex, and  
184 amyloid status, WMH volumes were significantly associated with a reduced youthful GI index  
185 ( $p < 0.001$ ) (Figure 5A). This was not true for the other metabolic measures ( $p > 0.05$ ; Figure  
186 5B).

187

## 188 DISCUSSION

189

190 Aging is associated with increased inter-individual variability in a variety of domains,  
191 including those related to brain function, structure, and neurodegeneration<sup>26-28</sup>. Here, we  
192 show that aging is similarly associated with increasingly variable changes in brain  
193 metabolism. As previously reported in a subset of these data<sup>18</sup>, sex accounts for some of this  
194 inter-individual variability. Now, we find that early cognitive impairment is associated with  
195 loss of the youthful pattern of brain AG and total glucose use, but not in the pattern of  
196 CMRO<sub>2</sub> nor CBF. This parallels our prior PET study showing that loss of brain AG is  
197 specifically associated with tau deposition in AD<sup>29</sup> as well as other whole brain studies of  
198 brain metabolism using the invasive Kety-Schmidt technique, where brain glucose  
199 consumption rates were shown to fall first during early stages of dementia, followed by  
200 decreases in oxygen consumption in later stages of dementia<sup>19-21</sup>. The reasons for a  
201 selective association between early symptomatic AD and loss of brain glycolysis are not yet  
202 clear, but this finding argues against ischemic processes and primary mitochondrial failure  
203 as causing a transition to early AD, since both of these would be expected to initially reduce  
204 CMRO<sub>2</sub> and CBF and increase glycolysis. Instead, preferential loss of cells or cellular  
205 components that rely more upon glycolysis, including synapses, axons or glia, might explain  
206 why glycolysis decreases first in early AD. Loss of allostatic mechanisms and synaptic  
207 plasticity is another possible hypothesis.

208

209 In contrast to the loss of glycolysis in early dementia, asymptomatic individuals with amyloid  
210 positivity demonstrate preservation of the youthful pattern of brain AG when compared to  
211 cognitively normal individuals without amyloid pathology; a similar finding was not seen for  
212 the other metabolic parameters nor CBF. We suggest a few possible, and not mutually-  
213 exclusive, explanations for this intriguing finding. It is possible that increased AG in these  
214 individuals reflects resilience mechanisms that allow them to preserve their cognitive  
215 function despite amyloid pathology. Our results parallel a prior study showing that FDG  
216 uptake was increased in select regions of highly cognitively resilient aged individuals,  
217 including medial frontal and anterior cingulate areas, which typically show high aerobic  
218 glycolysis during youth<sup>30</sup>. Accordingly, much like Wald's famous analysis of survivorship bias  
219 when investigating bullet holes in returning wartime airplanes<sup>31</sup>, the apparent "effects" of  
220 amyloid on brain metabolism in cognitively intact individuals might actually reflect resilience  
221 mechanisms to pathology, rather than amyloid-related damage. Cohort studies like these  
222 that require participant dedication, resources and/or altruism might further potentiate  
223 selection bias towards individuals with such resilience to neurodegeneration. These  
224 collective effects, what we have previously described as "resilience bias"<sup>32</sup>, might explain the  
225 relative preservation of brain AG in asymptomatic amyloid positive individuals seen here.

226

227 In vitro and animal studies have similarly shown that glycolysis is enhanced in amyloid-beta  
228 resistant neurons<sup>33-36</sup>. There are several potential mechanisms by which increased neuronal  
229 glycolysis might support resilience to amyloid pathology. In addition to producing NADH for  
230 oxidative capacity, glycolysis supplies several other critical metabolic pathways, including

231 those related to the Warburg Effect, biosynthesis of lipids, nucleic and amino acids, and  
232 reducing oxidative stress, namely via the pentose phosphate pathway. Through these  
233 metabolic pathways, glycolysis might support homeostatic maintenance of neuronal  
234 networks and synaptic plasticity, which could compensate for early subclinical sites of  
235 damage and oxidative stress. Moreover, there is increasing evidence that microglial activity,  
236 which relies upon increased AG, substantially influences the brain's response to amyloid  
237 pathology<sup>37,38</sup>. Animal models will be helpful to elucidate the cellular and sub-cellular  
238 locations of changes in glycolysis in the context of AD pathology.

239

240 The concept that youthful patterns of brain AG might reflect greater metabolic resilience to  
241 amyloid pathology might also help to explain why, at equivalent burdens of brain amyloid  
242 pathology, both chronological and brain age have been associated with an increased risk of  
243 cognitive impairment<sup>39-41</sup>. On the other hand, in young adults prior results have shown that  
244 brain amyloid preferentially deposits at sites of higher AG<sup>22,23</sup>; thus, the relationship between  
245 amyloid deposition and AG could well be bidirectional. Increased metabolic demand and  
246 stress might lead to failure of proteostasis, thereby leading to amyloid deposition.  
247 Conversely, amyloid deposition might incite increased metabolic stress and demand, in part  
248 as a compensatory resilience mechanism as suggested by this study<sup>42</sup>. Accordingly, a feed-  
249 forward loop might be established which could theoretically account for the accelerated  
250 "phase-transition" like change in amyloid deposition in the brain that is evident on  
251 longitudinal amyloid PET imaging<sup>23</sup>. Indeed, several studies have shown that metabolic  
252 stressors increase amyloid aggregation in the brain and even in other tissues such as  
253 pancreatic islet cells<sup>43-45</sup> and transgenic *C elegans*<sup>46</sup>. Maintaining the supportive features of  
254 glycolysis while reducing metabolic demand might represent a means to forestall the  
255 progression of amyloid deposition worthy of further investigation.

256

257 Here we now also demonstrate that WMH burden is significantly associated with loss of the  
258 youthful pattern of gray matter brain AG. It is conceivable that WMH impact brain AG by  
259 disrupting the connectivity among gray matter regions, thereby impairing both their function  
260 and ability to maintain allostasis. Hence, WMH might be a key factor in the loss of brain  
261 resilience to pathology, including in AD where it is increasingly recognized that WMH  
262 contribute to more rapid development of dementia. Alternatively (or in addition), loss of gray  
263 matter AG might impact white matter metabolism, and thereby trigger increased vulnerability  
264 to WMH due to the well-established reliance of axons upon glycolysis from the  
265 oligodendrocyte<sup>4,7</sup>. Further investigations are needed to more fully understand the  
266 association(s) between WMH and brain metabolism, particularly in the white matter.

267

268 Our study has important strengths including being the largest multi-tracer metabolic PET  
269 imaging study of its kind. However, a few important limitations warrant discussion. To limit  
270 participant burden, the PET methods employed in this cohort did not include arterial lines to  
271 fully quantify measures of brain metabolism, and normalization methods were used to  
272 minimize batch effects and improve signal-to-noise, thereby limiting the inferences that can  
273 be made from these results. Future confirmatory studies using quantitative PET methods are  
274 underway, including with higher intrinsic spatial resolution and signal-to-noise to obviate the  
275 need for normalization. Another caveat in this study is that only a small number of individuals  
276 underwent longitudinal assessments; thus our results could conceivably be confounded by  
277 generational cohort effects. Ongoing longitudinal studies of brain metabolism—ideally  
278 spanning decades—would be necessary to overcome this limitation.

279

280 In conclusion, our study suggests that maintaining a youthful pattern of brain AG is  
281 associated with initial resilience to brain amyloid pathology, whereas loss of this pattern  
282 occurs alongside cognitive impairment in AD. WMH are shown to be one factor that reduces  
283 brain AG. Further research investigating mechanisms by which AG is preserved or lost in the  
284 aging brain might reveal new opportunities to improve brain resilience to pathology.

285

### 286 **Acknowledgments**

287 We greatly appreciate Jennifer Byers and Kim Casey for their ongoing efforts in participant  
288 recruitment and acquiring data. We thank Abraham Z. Snyder, Matthew R. Brier and Lars  
289 Couture for their advice on the analyses of the PET and MRI imaging data. We also thank  
290 Christopher Owen in assisting in data analysis. We are particularly grateful for our research  
291 participants and their families for their altruism. We also acknowledge the directors and staff  
292 of the Neuroimaging Labs Research Center, Knight Alzheimer's Disease Research Center,  
293 Center for Clinical Imaging Research (CCIR), and the Washington University cyclotron  
294 facility for making this research possible.

295 Funding for this research was provided by the Barnes-Jewish Hospital Foundation (JCM),  
296 the James S. McDonnell Foundation, the McDonnell Center for Systems Neuroscience, the  
297 NIH/NIA R01AG053503 (AGV, MER), R01AG057536 (AGV, MSG), P50AG0005681 (JCM),  
298 P01AG026276 (JCM), and P01AG003991 (JCM, TLSB). Some of the MRI sequences used  
299 to produce the AMBR dataset were obtained from the Massachusetts General Hospital.  
300 Support for Flortetapir-F18 scans at the Knight Alzheimer Disease Research Center was  
301 provided by Avid Radiopharmaceuticals, a wholly owned subsidiary of Eli Lilly.

302

### 303 **Author Contributions**

304 MSG conceived of the study design, performed the analysis, and drafted and revised the  
305 manuscript. AGV conceived of the study design, oversaw data collection and processing,  
306 and revised the manuscript. TB performed and reviewed statistical analysis and revised the  
307 manuscript. NVM and MPM performed data processing and revised the manuscript. JS and  
308 MR performed data processing for WMH measurements and revised the manuscript. CX  
309 reviewed statistical analysis and revised the manuscript. MER conceived of the study design  
310 and critically revised the manuscript. JCM aided with the recruitment of participants, aided in  
311 study design, and critically revised the manuscript. TLSB aided in study design, oversaw  
312 data collection, and revised the manuscript. TJD coordinated study procedures and  
313 regulatory work, collected data, and critically revised the manuscript.

314

### 315 **Data and Software Availability**

316 These data constitute the Adult Metabolism & Brain Resilience (AMBR) dataset. Data  
317 availability is based on prior subject consents and the 2018 Common Rule<sup>47</sup>. Coded,  
318 processed regional data prior to further data and statistical analyses are available from the  
319 study authors upon reasonable request by a qualified researcher. Further requests for raw  
320 imaging data should be directed to the VG Lab and the Knight Alzheimer Disease Research  
321 Center studies from which these data were gathered (<http://adrc.wustl.edu>).

322





## 324 **METHODS**

### 325 *Participants and Regulatory Approvals*

326 This study was performed according to the principles outlined within the Declaration of  
327 Helsinki. All participants and/or their designated healthcare power of attorney consented to  
328 participation in one or more of these studies and for ongoing data analysis, as approved and  
329 overseen by the Washington University School of Medicine Institutional Review Board and  
330 the Radioactive Drug Research Committee. Data were gathered from participants enrolled in  
331 several different studies performed by the Vlassenko/Goyal (VG) Lab in the Neuroimaging  
332 Labs Research Center and the Knight Alzheimer Disease Research Center (ADRC), both at  
333 the Washington University School of Medicine in St. Louis.

334 A total of 285 individuals (56% women, self-reported sex / gender) aged 25-92 years were  
335 recruited from the Washington University community and the Knight ADRC. All participants  
336 had no neurological, psychiatric, or systemic medical illness that might compromise study  
337 participation. Individuals were excluded if they had contraindications to MRI, history of  
338 mental illness undergoing treatment, possible pregnancy, or medication use that could  
339 interfere with brain function. Clinical cognitive status was assessed on the basis of the  
340 Clinical Dementia Rating (CDR)<sup>48</sup>, or when CDR was unavailable, cognitive unimpairment  
341 was defined based on a combination of self-report and other available global cognitive tests,  
342 preferentially the AD8 or Short Blessed Test, or as a last resort, the Montreal Cognitive  
343 Assessment (MoCA) corrected for education.

### 344 *Brain metabolism PET imaging*

345 All participants underwent metabolic brain PET and MRI structural imaging for registration  
346 and brain structure segmentation as previously described<sup>17</sup>. All PET images were acquired  
347 in the eyes-closed waking state. No specific instructions were given regarding cognitive  
348 activity during scanning other than to remain awake. Briefly, <sup>18</sup>F-FDG, <sup>15</sup>O-O<sub>2</sub>, <sup>15</sup>O-HO<sub>2</sub>, and  
349 <sup>15</sup>O-CO PET scans were performed on participants in the awake, eyes closed state, and  
350 processed to yield regional maps of cerebral blood flow (CBF), cerebral oxygen consumption  
351 (CMRO<sub>2</sub>), total cerebral glucose metabolism (CMRGlc) and aerobic glycolysis (GI). Venous  
352 samples for plasma glucose determination were obtained just before and at the midpoint of  
353 the scan to verify that glucose levels were within normal range throughout the study, as well  
354 as to obtain blood radioactivity counts during the scan for future quantitative modeling. The  
355 PET images were blurred and resampled into the Desikan-Killiany atlas space<sup>49</sup>. These  
356 registrations and their corresponding transformations were performed with in-house  
357 software. Individual head movement during scanning was restricted by a thermoplastic  
358 mask. GI was defined by the residuals after spatially regressing CMRO<sub>2</sub> from CMRGlc<sup>24</sup>.

359 Each individual's GI, CMRGlc, CBF, and CMRO<sub>2</sub> images were partial volume corrected to  
360 regions defined by the Desikan-Killiany atlas and FreeSurfer subcortical parcellations.  
361 SUVR values were subsequently calculated for each segmented cortical and deep gray  
362 matter regions, and scaled to have whole brain means of 1. Our routine partial volume  
363 corrected PET pipeline excludes results from the frontal and temporal poles, accumbens  
364 area and parahippocampal region as these regions are highly vulnerable to noise artifact  
365 due to their location and size. All remaining regional data were then subjected to quantile  
366 normalization across PET sessions for each metabolic parameter, to account for known and  
367 unknown "batch effects" that might have occurred since the beginning of data collection in  
368 2013. Though this normalization procedure removes quantitative information, it effectively

369 retains rank topography while minimizing biases arising from such “batch effects” over time,  
370 including those related to scanner or radioactive tracer variability<sup>17,50</sup>.

### 371 *Amyloid brain PET imaging*

372 Research amyloid brain PET imaging was performed either with <sup>11</sup>C-PIB (~12 mCi) or  
373 Florbetapir-F18 (~10 mCi), injected intravenously as a single bolus followed by 60 (<sup>11</sup>C-PIB)  
374 or 70 (Florbetapir-F18) minutes of brain PET imaging. PET imaging was performed on a  
375 Siemens Biograph PET/CT or HR+ scanner (Siemens/CTI, Knoxville, KY).

376 All available amyloid imaging underwent our in-house routine amyloid brain PET processing  
377 pipeline that included the following processing steps: framewise motion correction,  
378 registration to individual MRI T1 sequences, activity extraction within FreeSurfer v5.3  
379 segmentations based on the Desikan-Killiany Atlas<sup>49</sup>, and partial volume correction using the  
380 regional spread function implemented within a geometric transfer matrix framework, as has  
381 been described in detail previously<sup>51-53</sup>. SUVR values were subsequently calculated for each  
382 segmented cortical and deep gray matter regions, referenced to the cerebellar gray matter  
383 (i.e., cerebellum SUVR = 1). A mean cortical SUVR (MC-SUVR) was calculated by  
384 averaging the SUVR values from prefrontal, parietal and temporal cortical regions. Unless  
385 otherwise noted, a threshold MC-SUVR  $\geq 1.42$  is used to define a quantitatively ‘positive’  
386 amyloid <sup>11</sup>C-PIB scan, based on previously published studies<sup>29,54-56</sup>.

387 Amyloid status was considered to remain positive after any positive PET scan. Conversely,  
388 amyloid status was considered to have been negative for the duration prior to any negative  
389 PET scan. When a research amyloid scan was unavailable, the results from a clinical  
390 amyloid scan, if available, was used instead to determine amyloid status at the time of the  
391 metabolic PET session.

### 392 *MRI imaging*

393 MRI scans were obtained in all individuals to guide anatomic localization and identify specific  
394 gray matter regions. High-resolution structural images were acquired using 1.5T (Vision,  
395 Siemens, Erlangen, Germany) and 3T (Trio or Prisma, Siemens) scanners including a 3D  
396 sagittal T1-weighted magnetization-prepared 180° radio-frequency pulses and rapid  
397 gradient-echo (MPRAGE) sequence, with resolutions ranging from 0.8 x 0.8 x 0.8 mm to 1 x  
398 1 x 1.3 mm. In a subset of individuals undergoing 3T MRI, 1 x 1 x 1 mm isotropic FLAIR  
399 sequences were obtained for WMH assessment.

400 FreeSurfer Analysis: FreeSurfer v5.3 software<sup>49,57,58</sup> was used to segment the brain into well-  
401 defined cortical and subcortical, gray and white matter regions of interest (ROIs) based on  
402 individual MPRAGE MRI scans using the Desikan-Killiany and base FreeSurfer subcortical  
403 atlases. These ROIs were then used for the regional estimation of all PET metabolism  
404 parameters.

### 405 *WMH measurement*

406 WMH severity was quantified by segmenting high signal intensity regions on individual  
407 FLAIR scans using the manually segmented intensity thresholds (MSIT) method. Each  
408 FLAIR scan was first preprocessed with tools in FSL for brain extraction<sup>59</sup>, bias field  
409 correction<sup>60</sup> and rigid body registration<sup>61</sup> to an individual's corresponding T1 image. For  
410 segmentation, an intensity threshold of  $\geq 1.2$  standard deviation (SD) was applied with an in-  
411 house MATLAB script at each axial slice. This threshold has shown to maximize the  
412 sensitivity for manually identifying WMH, as applied in other neurodegenerative cohorts<sup>62,63</sup>.

413 Manual tracings were then performed where needed by identifying true lesions from false  
414 positives due to motion, fat signal, ventricles or other sources that would not be considered  
415 WMH. To ensure that all WMH clusters were fully represented, the manually selected  
416 clusters were treated as seed regions and allowed to expand one voxel outwards all  
417 directions with a signal intensity restriction of  $\geq 0.5$  SD. All WMH binary masks were drawn by  
418 the same two raters. A neuroradiologist subsequently reviewed the WMH segmentations for  
419 accuracy.  
420  
421

422 **References**

423

- 424 1 Blazey, T., Snyder, A. Z., Goyal, M. S., Vlassenko, A. G. & Raichle, M. E. A  
425 systematic meta-analysis of oxygen-to-glucose and oxygen-to-carbohydrate ratios in  
426 the resting human brain. *PLoS One* **13**, e0204242,  
427 doi:10.1371/journal.pone.0204242 (2018).
- 428 2 Segarra-Mondejar, M. *et al.* Synaptic activity-induced glycolysis facilitates membrane  
429 lipid provision and neurite outgrowth. *The EMBO journal* **37**,  
430 doi:10.15252/embj.201797368 (2018).
- 431 3 Chen, K. *et al.* Lactate transport facilitates neurite outgrowth. *Bioscience reports* **38**,  
432 doi:10.1042/BSR20180157 (2018).
- 433 4 Funfschilling, U. *et al.* Glycolytic oligodendrocytes maintain myelin and long-term  
434 axonal integrity. *Nature* **485**, 517-521, doi:10.1038/nature11007 (2012).
- 435 5 Steiner, J. *et al.* Clozapine promotes glycolysis and myelin lipid synthesis in cultured  
436 oligodendrocytes. *Front Cell Neurosci* **8**, 384, doi:10.3389/fncel.2014.00384 (2014).
- 437 6 Ghosh, S., Castillo, E., Frias, E. S. & Swanson, R. A. Bioenergetic regulation of  
438 microglia. *Glia* **66**, 1200-1212, doi:10.1002/glia.23271 (2018).
- 439 7 Nave, K. A. Myelination and the trophic support of long axons. *Nat Rev Neurosci* **11**,  
440 275-283, doi:10.1038/nrn2797 (2010).
- 441 8 Harris, R. A. *et al.* Aerobic Glycolysis Is Required for Spatial Memory Acquisition But  
442 Not Memory Retrieval in Mice. *eNeuro* **6**, doi:10.1523/ENEURO.0389-18.2019  
443 (2019).
- 444 9 Shannon, B. J. *et al.* Brain aerobic glycolysis and motor adaptation learning. *Proc*  
445 *Natl Acad Sci U S A* **113**, E3782-3791, doi:10.1073/pnas.1604977113 (2016).
- 446 10 Butterfield, D. A. & Halliwell, B. Oxidative stress, dysfunctional glucose metabolism  
447 and Alzheimer disease. *Nat Rev Neurosci* **20**, 148-160, doi:10.1038/s41583-019-  
448 0132-6 (2019).
- 449 11 Brown, A. M. & Ransom, B. R. Astrocyte glycogen as an emergency fuel under  
450 conditions of glucose deprivation or intense neural activity. *Metab Brain Dis* **30**, 233-  
451 239, doi:10.1007/s11011-014-9588-2 (2015).
- 452 12 Baik, S. H. *et al.* A Breakdown in Metabolic Reprogramming Causes Microglia  
453 Dysfunction in Alzheimer's Disease. *Cell metabolism* **30**, 493-507 e496,  
454 doi:10.1016/j.cmet.2019.06.005 (2019).
- 455 13 Holland, R. *et al.* Inflammatory microglia are glycolytic and iron retentive and typify  
456 the microglia in APP/PS1 mice. *Brain Behav Immun* **68**, 183-196,  
457 doi:10.1016/j.bbi.2017.10.017 (2018).
- 458 14 Goyal, M. S., Hawrylycz, M., Miller, J. A., Snyder, A. Z. & Raichle, M. E. Aerobic  
459 glycolysis in the human brain is associated with development and neotenus gene  
460 expression. *Cell metabolism* **19**, 49-57, doi:10.1016/j.cmet.2013.11.020 (2014).
- 461 15 Dastur, D. K. Cerebral blood flow and metabolism in normal human aging,  
462 pathological aging, and senile dementia. *J Cereb Blood Flow Metab* **5**, 1-9,  
463 doi:10.1038/jcbfm.1985.1 (1985).
- 464 16 Gottstein, U. & Held, K. Effects of aging on cerebral circulation and metabolism in  
465 man. *Acta Neurol Scand* **60**, 54-55 (1979).
- 466 17 Goyal, M. S. *et al.* Loss of Brain Aerobic Glycolysis in Normal Human Aging. *Cell*  
467 *metabolism* **26**, 353-360 e353, doi:10.1016/j.cmet.2017.07.010 (2017).
- 468 18 Goyal, M. S. *et al.* Persistent metabolic youth in the aging female brain. *Proc Natl*  
469 *Acad Sci U S A* **116**, 3251-3255, doi:10.1073/pnas.1815917116 (2019).
- 470 19 Hoyer, S. Abnormalities of glucose metabolism in Alzheimer's disease. *Ann N Y Acad*  
471 *Sci* **640**, 53-58, doi:10.1111/j.1749-6632.1991.tb00190.x (1991).
- 472 20 Hoyer, S. Brain glucose and energy metabolism abnormalities in sporadic Alzheimer  
473 disease. Causes and consequences: an update. *Exp Gerontol* **35**, 1363-1372,  
474 doi:10.1016/s0531-5565(00)00156-x (2000).

- 475 21 Ogawa, M., Fukuyama, H., Ouchi, Y., Yamauchi, H. & Kimura, J. Altered energy  
476 metabolism in Alzheimer's disease. *J Neurol Sci* **139**, 78-82 (1996).
- 477 22 Vlassenko, A. G. *et al.* Spatial correlation between brain aerobic glycolysis and  
478 amyloid-beta (Abeta ) deposition. *Proc Natl Acad Sci U S A* **107**, 17763-17767,  
479 doi:10.1073/pnas.1010461107 (2010).
- 480 23 Goyal, M. S. *et al.* Spatiotemporal relationship between subthreshold amyloid  
481 accumulation and aerobic glycolysis in the human brain. *Neurobiology of Aging*,  
482 doi:<https://doi.org/10.1016/j.neurobiolaging.2020.08.019> (2020).
- 483 24 Vaishnavi, S. N. *et al.* Regional aerobic glycolysis in the human brain. *Proc Natl Acad Sci U S A* **107**, 17757-17762, doi:10.1073/pnas.1010459107 (2010).
- 484 25 Yeo, I. K. & Johnson, R. A. A new family of power transformations to improve  
485 normality or symmetry. *Biometrika* **87**, 954-959, doi:DOI 10.1093/biomet/87.4.954  
486 (2000).
- 487 26 Morse, C. K. Does variability increase with age? An archival study of cognitive  
488 measures. *Psychol Aging* **8**, 156-164, doi:10.1037//0882-7974.8.2.156 (1993).
- 489 27 Tian, Q. *et al.* The brain map of gait variability in aging, cognitive impairment and  
490 dementia-A systematic review. *Neurosci Biobehav Rev* **74**, 149-162,  
491 doi:10.1016/j.neubiorev.2017.01.020 (2017).
- 492 28 Thompson, P. M. *et al.* Cortical variability and asymmetry in normal aging and  
493 Alzheimer's disease. *Cereb Cortex* **8**, 492-509, doi:10.1093/cercor/8.6.492 (1998).
- 494 29 Vlassenko, A. G. *et al.* Aerobic glycolysis and tau deposition in preclinical Alzheimer's  
495 disease. *Neurobiol Aging* **67**, 95-98, doi:10.1016/j.neurobiolaging.2018.03.014  
496 (2018).
- 497 30 Arenaza-Urquijo, E. M. *et al.* The metabolic brain signature of cognitive resilience in  
498 the 80+: beyond Alzheimer pathologies. *Brain* **142**, 1134-1147,  
499 doi:10.1093/brain/awz037 (2019).
- 500 31 Wald, A. A Reprint of A Method of Estimating Plane Vulnerability Based on Damage  
501 of Survivors. (CENTER FOR NAVAL ANALYSES ALEXANDRIA VA OPERATIONS  
502 EVALUATION GROUP, 1980).
- 503 32 Goyal, M. S., Vlassenko, A. G. & Raichle, M. E. Reply to Biskup *et al.* and Tu *et al.*:  
504 Sex differences in metabolic brain aging. *Proc Natl Acad Sci U S A* **116**, 10634-  
505 10635, doi:10.1073/pnas.1904673116 (2019).
- 506 33 Soucek, T., Cumming, R., Dargusch, R., Maher, P. & Schubert, D. The regulation of  
507 glucose metabolism by HIF-1 mediates a neuroprotective response to amyloid beta  
508 peptide. *Neuron* **39**, 43-56, doi:10.1016/s0896-6273(03)00367-2 (2003).
- 509 34 Newington, J. T. *et al.* Amyloid beta resistance in nerve cell lines is mediated by the  
510 Warburg effect. *PLoS One* **6**, e19191, doi:10.1371/journal.pone.0019191 (2011).
- 511 35 Lone, A., Harris, R. A., Singh, O., Betts, D. H. & Cumming, R. C. p66Shc activation  
512 promotes increased oxidative phosphorylation and renders CNS cells more  
513 vulnerable to amyloid beta toxicity. *Sci Rep* **8**, 17081, doi:10.1038/s41598-018-  
514 35114-y (2018).
- 515 36 Arias, C., Montiel, T., Quiroz-Baez, R. & Massieu, L. beta-Amyloid neurotoxicity is  
516 exacerbated during glycolysis inhibition and mitochondrial impairment in the rat  
517 hippocampus in vivo and in isolated nerve terminals: implications for Alzheimer's  
518 disease. *Exp Neurol* **176**, 163-174, doi:10.1006/exnr.2002.7912 (2002).
- 519 37 Leng, F. & Edison, P. Neuroinflammation and microglial activation in Alzheimer  
520 disease: where do we go from here? *Nat Rev Neurol* **17**, 157-172,  
521 doi:10.1038/s41582-020-00435-y (2021).
- 522 38 Knopman, D. S. *et al.* Alzheimer disease. *Nat Rev Dis Primers* **7**, 33,  
523 doi:10.1038/s41572-021-00269-y (2021).
- 524 39 Schindler, S. E. *et al.* Predicting Symptom Onset in Sporadic Alzheimer Disease With  
525 Amyloid PET. *Neurology* **97**, e1823-e1834, doi:10.1212/WNL.0000000000012775  
526 (2021).
- 527

- 528 40 Millar, P. R. *et al.* Predicting brain age from functional connectivity in symptomatic  
529 and preclinical Alzheimer disease. *Neuroimage*, 119228,  
530 doi:10.1016/j.neuroimage.2022.119228 (2022).
- 531 41 Cole, J. H., Marioni, R. E., Harris, S. E. & Deary, I. J. Brain age and other bodily  
532 'ages': implications for neuropsychiatry. *Mol Psychiatry* **24**, 266-281,  
533 doi:10.1038/s41380-018-0098-1 (2019).
- 534 42 Santangelo, R. *et al.* beta-amyloid monomers drive up neuronal aerobic glycolysis in  
535 response to energy stressors. *Aging* **13**, 18033-18050, doi:10.18632/aging.203330  
536 (2021).
- 537 43 Montane, J., Klimek-Abercrombie, A., Potter, K. J., Westwell-Roper, C. & Bruce  
538 Verchere, C. Metabolic stress, IAPP and islet amyloid. *Diabetes Obes Metab* **14**  
539 **Suppl 3**, 68-77, doi:10.1111/j.1463-1326.2012.01657.x (2012).
- 540 44 Gasparini, L. *et al.* Effect of energy shortage and oxidative stress on amyloid  
541 precursor protein metabolism in COS cells. *Neurosci Lett* **231**, 113-117,  
542 doi:10.1016/s0304-3940(97)00536-3 (1997).
- 543 45 Cai, Z., Zhao, B. & Ratka, A. Oxidative stress and beta-amyloid protein in Alzheimer's  
544 disease. *Neuromolecular Med* **13**, 223-250, doi:10.1007/s12017-011-8155-9 (2011).
- 545 46 Teo, E. *et al.* Metabolic stress is a primary pathogenic event in transgenic  
546 *Caenorhabditis elegans* expressing pan-neuronal human amyloid beta. *Elife* **8**,  
547 doi:10.7554/eLife.50069 (2019).
- 548 47 Menikoff, J., Kaneshiro, J. & Pritchard, I. The Common Rule, Updated. *N Engl J Med*  
549 **376**, 613-615, doi:10.1056/NEJMp1700736 (2017).
- 550 48 Morris, J. C. The Clinical Dementia Rating (CDR): current version and scoring rules.  
551 *Neurology* **43**, 2412-2414, doi:10.1212/wnl.43.11.2412-a (1993).
- 552 49 Desikan, R. S. *et al.* An automated labeling system for subdividing the human  
553 cerebral cortex on MRI scans into gyral based regions of interest. *Neuroimage* **31**,  
554 968-980, doi:10.1016/j.neuroimage.2006.01.021 (2006).
- 555 50 Leek, J. T. *et al.* Tackling the widespread and critical impact of batch effects in high-  
556 throughput data. *Nat Rev Genet* **11**, 733-739, doi:10.1038/nrg2825 (2010).
- 557 51 Su, Y. *et al.* Partial volume correction in quantitative amyloid imaging. *Neuroimage*  
558 **107**, 55-64, doi:10.1016/j.neuroimage.2014.11.058 (2015).
- 559 52 Su, Y. *et al.* Utilizing the Centiloid scale in cross-sectional and longitudinal PiB PET  
560 studies. *Neuroimage Clin* **19**, 406-416, doi:10.1016/j.nicl.2018.04.022 (2018).
- 561 53 Su, Y. *et al.* Comparison of Pittsburgh compound B and florbetapir in cross-sectional  
562 and longitudinal studies. *Alzheimers Dement (Amst)* **11**, 180-190,  
563 doi:10.1016/j.dadm.2018.12.008 (2019).
- 564 54 Jack, C. R., Jr. *et al.* Age-specific and sex-specific prevalence of cerebral beta-  
565 amyloidosis, tauopathy, and neurodegeneration in cognitively unimpaired individuals  
566 aged 50-95 years: a cross-sectional study. *Lancet Neurol* **16**, 435-444,  
567 doi:10.1016/S1474-4422(17)30077-7 (2017).
- 568 55 Mintun, M. A. *et al.* [11C]PIB in a nondemented population: potential antecedent  
569 marker of Alzheimer disease. *Neurology* **67**, 446-452,  
570 doi:10.1212/01.wnl.0000228230.26044.a4 (2006).
- 571 56 Su, Y. *et al.* Quantitative analysis of PiB-PET with FreeSurfer ROIs. *PLoS One* **8**,  
572 e73377, doi:10.1371/journal.pone.0073377 (2013).
- 573 57 Fischl, B. *et al.* Whole brain segmentation: automated labeling of neuroanatomical  
574 structures in the human brain. *Neuron* **33**, 341-355, doi:10.1016/s0896-  
575 6273(02)00569-x (2002).
- 576 58 Fischl, B. *et al.* Automatically parcellating the human cerebral cortex. *Cereb Cortex*  
577 **14**, 11-22, doi:10.1093/cercor/bhg087 (2004).
- 578 59 Smith, S. M. Fast robust automated brain extraction. *Hum Brain Mapp* **17**, 143-155,  
579 doi:10.1002/hbm.10062 (2002).
- 580 60 Zhang, Y., Brady, M. & Smith, S. Segmentation of brain MR images through a hidden  
581 Markov random field model and the expectation-maximization algorithm. *IEEE Trans*  
582 *Med Imaging* **20**, 45-57, doi:10.1109/42.906424 (2001).

- 583 61 Jenkinson, M. & Smith, S. A global optimisation method for robust affine registration  
584 of brain images. *Med Image Anal* **5**, 143-156, doi:10.1016/s1361-8415(01)00036-6  
585 (2001).
- 586 62 Hubbard, N. A. *et al.* Calibrated imaging reveals altered grey matter metabolism  
587 related to white matter microstructure and symptom severity in multiple sclerosis.  
588 *Hum Brain Mapp* **38**, 5375-5390, doi:10.1002/hbm.23727 (2017).
- 589 63 Strain, J. *et al.* Depressive symptoms and white matter dysfunction in retired NFL  
590 players with concussion history. *Neurology* **81**, 25-32,  
591 doi:10.1212/WNL.0b013e318299ccf8 (2013).  
592  
593

594 Fig. 1.

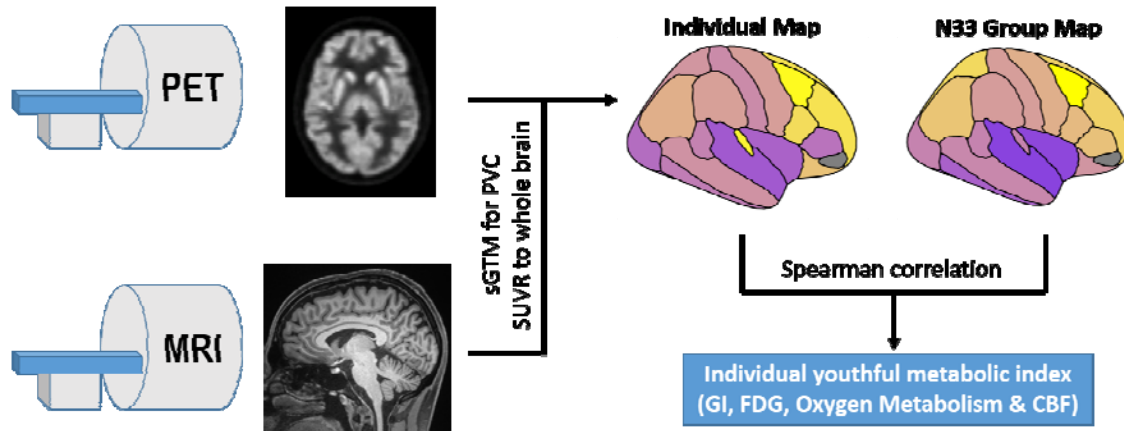

595

596

597 **Figure 1. Schematic overview of youthful brain metabolism calculation.** Separate  
598 resting PET and MRI scans were obtained in individuals. PET scans were preprocessed and  
599 then combined with MRI to calculate partial volume corrected regional SUVR values in the  
600 gray matter. Each individual map of brain metabolism and CBF was then compared to the  
601 corresponding group map obtained in the separate N33 young adult cohort using a  
602 Spearman correlation. The final rho value was used as the “youthful metabolic index” for that  
603 individual and specific metabolic parameter (GI, FDG, oxygen metabolism and CBF).

604

605



606 Fig. 2.

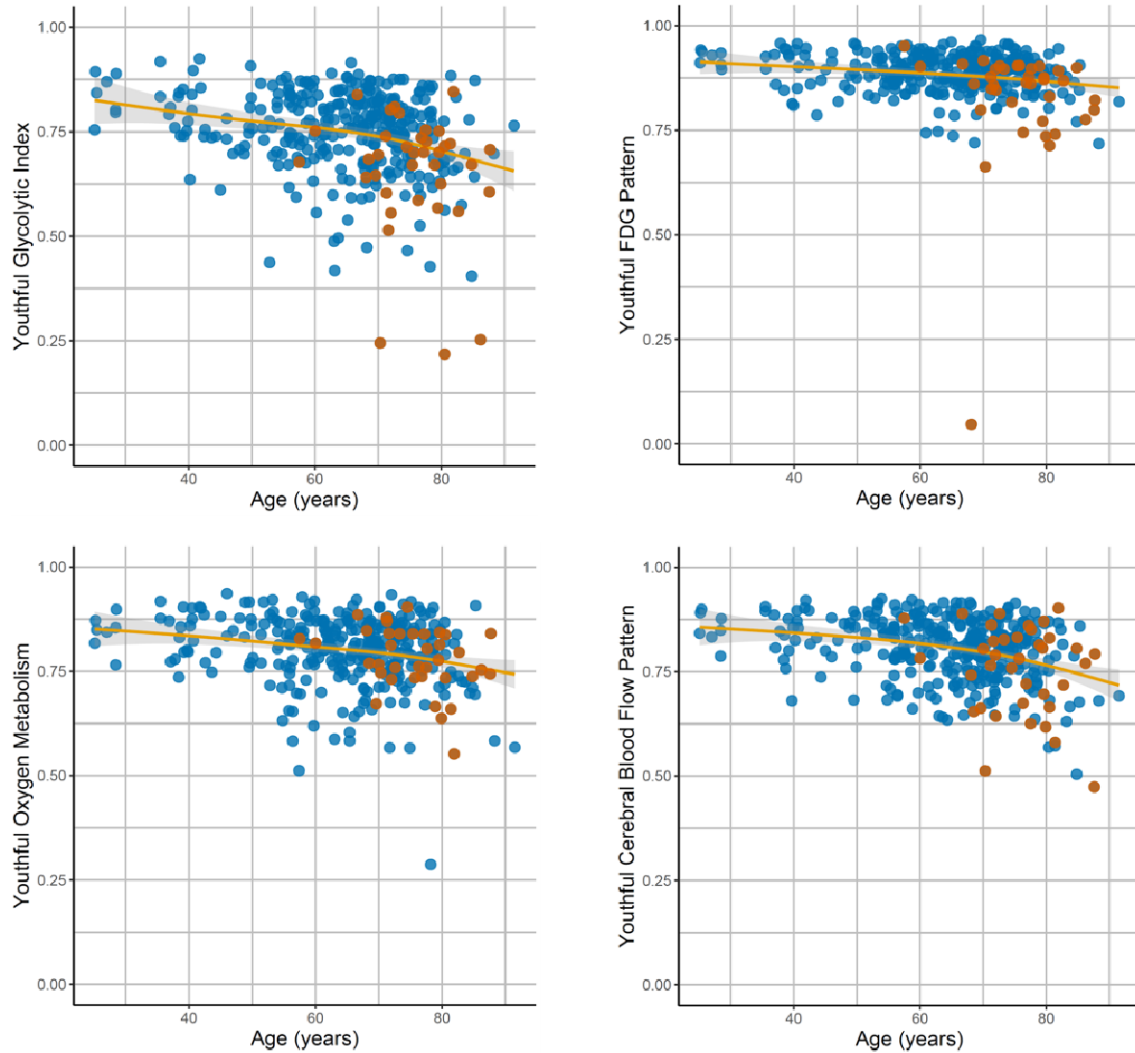

607  
608

609 **Figure 2. Differences in the youthful pattern of brain metabolism with age and**  
610 **cognitive impairment.** A youthful metabolic index was calculated for aerobic glycolysis (GI),  
611 CMRGlC (FDG), oxygen metabolism (CMRO<sub>2</sub>) and cerebral blood flow (CBF) (see Fig. 1).  
612 This was calculated for each of the 353 PET sessions. All indices on average decreased  
613 with age (solid lines are generalized additive model [gam] fits with shaded bars reflecting  
614 standard error). However, this occurred variably, with some individuals showing a preserved  
615 youthful pattern whereas others showing a decrease in the index. Cognitively impaired  
616 individuals (red dots) were more likely to have decreased youthful GI and CMRGlC indices.  
617 This was not true, however, for CMRO<sub>2</sub> nor CBF.

618

619 Fig. 3.

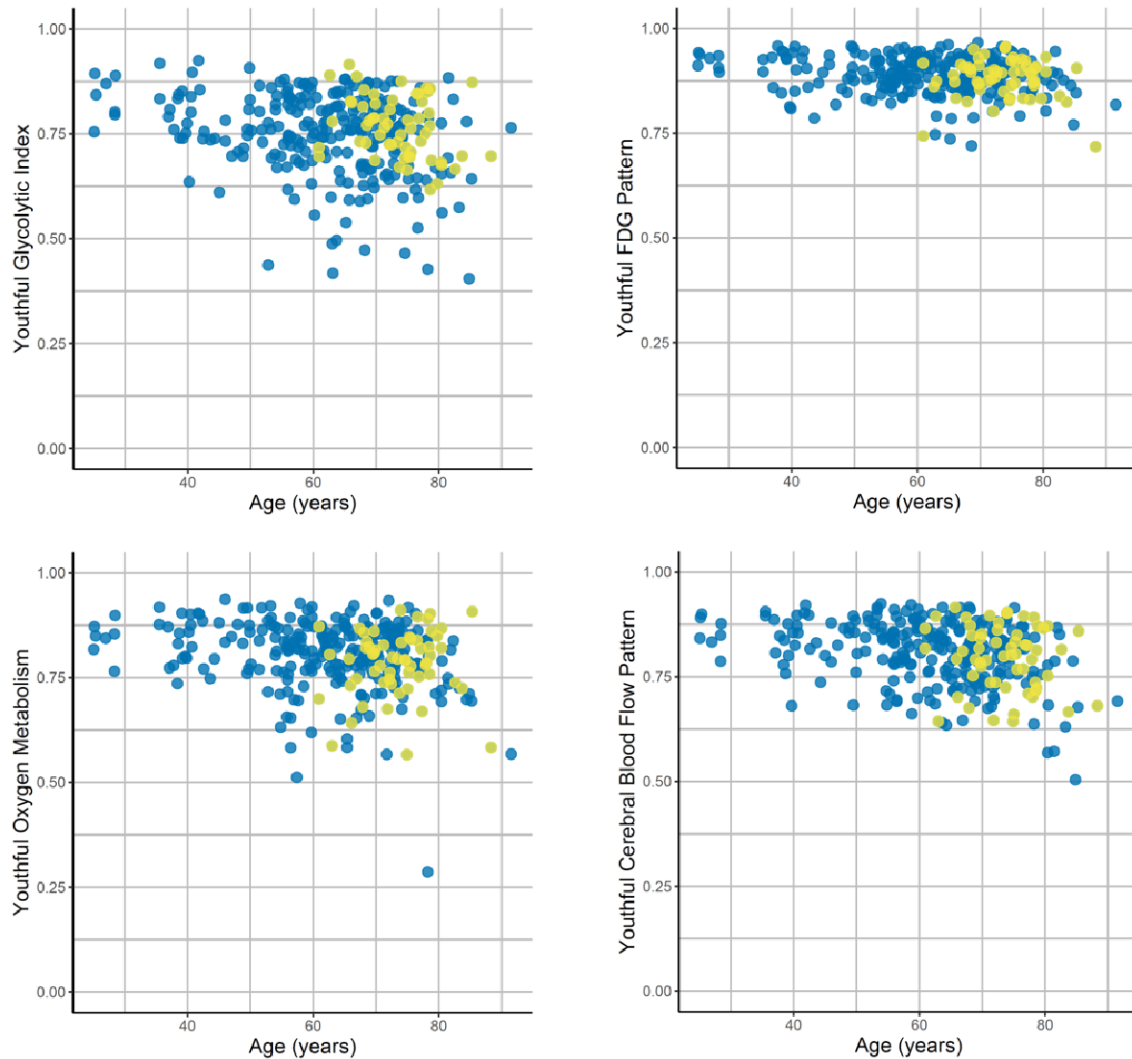

620

621

622 **Figure 3. Association of amyloid positivity with youthful brain metabolism.**

623 Correlations to the youthful pattern of the GI, FDG, oxygen metabolism and cerebral blood

624 flow were measured for each individual PET session (see Fig. 1). In this analysis only

625 cognitively unimpaired individuals were included. Among these individuals, known amyloid

626 positivity (yellow dots) was associated with relatively preserved youthful GI as compared to

627 other adults, adjusting for age and sex. This was not true for CMRGlc, CMRO<sub>2</sub> nor CBF.

628 Blue dots reflect amyloid negativity or unknown status (n=80, including n=62 among those <

629 60 yo).

630

631

632 Fig. 4.

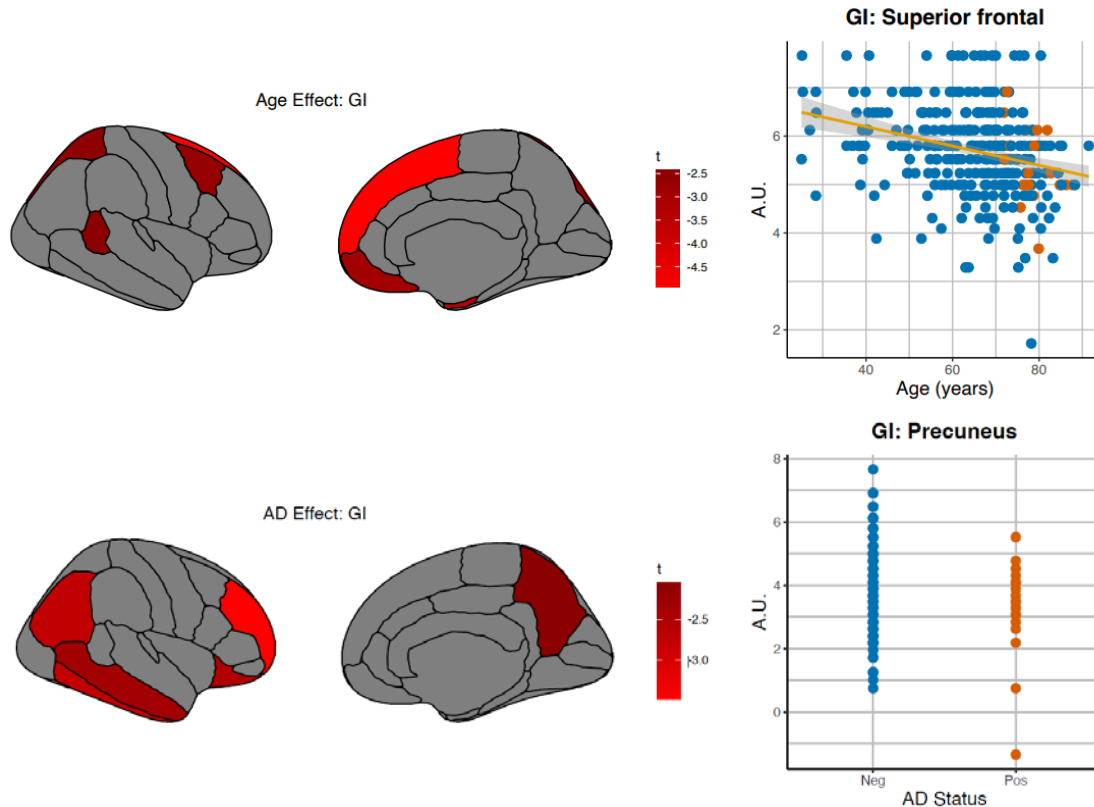

633

634

635

636 **Figure 4. Associations of regional glycolysis (GI) with aging and Alzheimer's disease.**

637 The associations of aging and symptomatic Alzheimer's disease (AD) with GI were explored  
638 at a regional level. Regression models were constructed for each independent gray matter  
639 region relating GI to age, sex, and Alzheimer's disease, and subject as a random effect. As  
640 this was an exploratory non-quantitative analysis, only regions showing a significant  
641 decrease (defined *a priori* as t-score < -1.96, uncorrected) in GI are shown here, noting that  
642 both age and AD are known to be associated with lower whole brain AG<sup>17,19,20</sup>. Aging was  
643 associated with relative decreases primarily in medial frontal and dorsal frontal and parietal  
644 areas, consistent with that reported previously. Alzheimer's disease was associated with  
645 decreases in the precuneus, prefrontal, lateral parietal and temporal regions.

646

647

648 Fig. 5.  
649

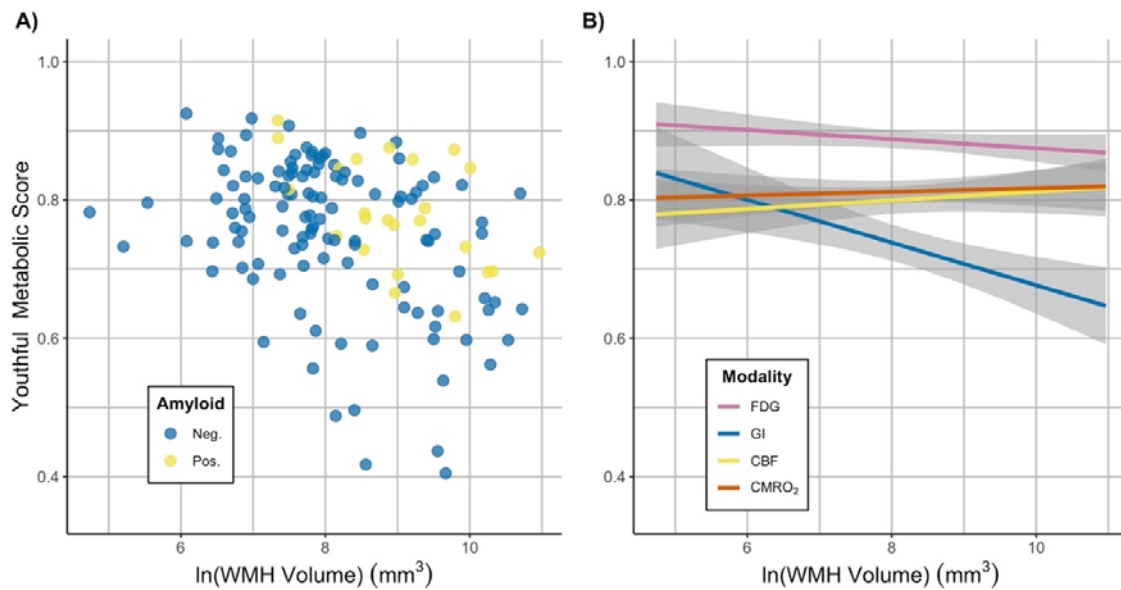

650  
651

652 **Figure 5. Association of white matter hyperintensities (WMH) with youthful brain**  
653 **metabolism in cognitively normal individuals. A)** WMH volume (log transformed) was  
654 negatively associated with the youthful pattern of AG (GI) ( $p < 0.001$ ). Amyloid positive  
655 participants are shown in yellow and negative individuals in blue. **B)** Model predictions for  
656 the association between youthful metabolic indices and WMH volume are shown. Unlike  
657 brain AG (“GI”, blue), neither total glucose consumption (“FDG”, pink), blood flow (“CBF”,  
658 yellow), nor oxygen consumption (“CMRO<sub>2</sub>”, red) was significantly associated with WMH  
659 volume ( $p > 0.05$ ). 95% confidence intervals are shown in gray. All models in **A)** and **B)** are  
660 adjusted for age, sex, and amyloid status.
